# Supplementary material for: Special Attention to Physical Activity in Breast Cancer Patients during the First Wave of COVID-19 Pandemic in Italy: The DianaWeb Cohort
Source: MDPI journal article supplement (doi:10.3390/jpm11050381), 2021-05-06
Supplement: s1 [file s1]

## Supplementary Materials

**Table S1.** PA levels (MET-min/week) and sitting/lying time (h:min/day) by sociodemographic characteristics, region of residence, number of family members, dwelling floor space, private outdoor spaces, residential density, self-reported PA strategies, anthropometric parameters, quality of life, and health perception and use of psychotropic drugs of the study population during quarantine. Data are expressed as the means  $\pm$  SD and percent of respondents engaged in PA or in sitting/lying.

|                               | Vigorous intensity PA        | Moderate intensity PA           | Walking                      | Total PA                       | Sitting/lying    |
|-------------------------------|------------------------------|---------------------------------|------------------------------|--------------------------------|------------------|
| Age                           |                              |                                 |                              |                                |                  |
| <b>21–40 years</b>            | 224.44 $\pm$ 531.97<br>22.2% | 873.89 $\pm$ 996.68<br>91.7%    | 227.24 $\pm$ 614.32<br>44.4% | 1325.57 $\pm$ 1460.79<br>94.4% | 7:51 $\pm$ 3:00  |
| 41–60 years                   | 124.98 $\pm$ 487.14<br>11.9% | 849.57 $\pm$ 896.38<br>89.9%    | 330.40 $\pm$ 564.86<br>61.0% | 1304.95 $\pm$ 1262.09<br>94.0% | 7:20 $\pm$ 3:09  |
| Over 60                       | 74.73 $\pm$ 390.37<br>7.7%   | 1016.59 $\pm$ 1052.06<br>88.5%  | 357.09 $\pm$ 660.65<br>62.6% | 1448.41 $\pm$ 1403.37<br>93.4% | 6:25 $\pm$ 3:01* |
| <i>Pearson's corr. coeff.</i> | <i>-0.084*</i>               | <i>0.067*</i>                   | <i>0.045</i>                 | <i>0.038</i>                   | <i>-0.150*</i>   |
| Marital status                |                              |                                 |                              |                                |                  |
| <b>Never married</b>          | 150.42 $\pm$ 593.37<br>14.8% | 634.23 $\pm$ 767.22<br>89.4%    | 345.82 $\pm$ 622.55<br>65.5% | 1130.47 $\pm$ 1253.82<br>95.1% | 7:30 $\pm$ 3:20  |
| Widowed                       | 137.14 $\pm$ 551.59<br>9.5%  | 1001.90 $\pm$ 1092.45<br>81.0%  | 315.81 $\pm$ 709.93<br>52.4% | 1454.86 $\pm$ 1554.58<br>85.7% | 6:24 $\pm$ 2:59  |
| Separated/divorced            | 118.26 $\pm$ 462.61<br>12.0% | 905.65 $\pm$ 825.16<br>94.6%    | 314.03 $\pm$ 449.17<br>65.2% | 1337.95 $\pm$ 1011.06<br>98.9% | 6:51 $\pm$ 2:53  |
| Married                       | 107.98 $\pm$ 427.60<br>10.5% | 949.66 $\pm$ 985.83*<br>89.0%   | 331.23 $\pm$ 599.48<br>58.7% | 1388.87 $\pm$ 1351.27<br>92.8% | 7:09 $\pm$ 3:08  |
| <i>Spearman's Rho</i>         | <i>-0.046</i>                | <i>0.105*</i>                   | <i>-0.032</i>                | <i>1.000</i>                   | <i>-0.015</i>    |
| Levels of education           |                              |                                 |                              |                                |                  |
| <b><math>\leq 13</math> y</b> | 102.96 $\pm$ 519.69<br>7.7%  | 951.22 $\pm$ 966.23<br>90.6%    | 295.95 $\pm$ 541.72<br>59.4% | 1350.13 $\pm$ 1302.91<br>93.9% | 6:53 $\pm$ 3:06  |
| >13 y                         | 132.54 $\pm$ 411.29<br>15.2% | 825.35 $\pm$ 911.51<br>88.4%    | 367.20 $\pm$ 634.27<br>61.7% | 1325.10 $\pm$ 1309.68<br>93.6% | 7:25 $\pm$ 3:09* |
| Working activity              |                              |                                 |                              |                                |                  |
| <b>Retired or laid off</b>    | 71.63 $\pm$ 345.63<br>8.4%   | 935.16 $\pm$ 970.80<br>87.0%    | 402.52 $\pm$ 720.61<br>60.9% | 1409.31 $\pm$ 1376.70<br>92.6% | 6:09 $\pm$ 2:53  |
| Remote working                | 143.98 $\pm$ 454.40<br>14.5% | 788.12 $\pm$ 836.46<br>91.2%    | 293.52 $\pm$ 512.56<br>60.5% | 1225.62 $\pm$ 1179.74<br>94.9% | 8:02 $\pm$ 3:04* |
| Normal working                | 47.78 $\pm$ 163.57<br>9.7%   | 668.89 $\pm$ 753.60<br>86.1%    | 355.33 $\pm$ 637.08<br>56.9% | 1071.99 $\pm$ 1158.19<br>91.7% | 7:00 $\pm$ 3:10  |
| Other                         | 157.75 $\pm$ 705.54<br>9.2%  | 1178.17 $\pm$ 1140.82*<br>90.8% | 305.69 $\pm$ 518.74<br>62.0% | 1641.61 $\pm$ 1497.78<br>93.7% | 6:35 $\pm$ 3:06  |
| <i>Spearman's Rho</i>         | <i>0.014</i>                 | <i>0.047</i>                    | <i>-0.012</i>                | <i>0.028</i>                   | <i>0.070</i>     |

|                           |                          |                             |                           |                             |                |
|---------------------------|--------------------------|-----------------------------|---------------------------|-----------------------------|----------------|
| Region of residence       |                          |                             |                           |                             |                |
| <b>Northern Italy</b>     | 121.25 ± 500.51<br>11.1% | 853.68 ± 900.50<br>89.2%    | 327.28 ± 583.58<br>60.1%  | 1302.21 ± 1284.89<br>93.4%  | 7:10 ± 3:09    |
| Central Italy             | 144.06 ± 423.33<br>15.6% | 910.78 ± 968.64<br>90.6%    | 300.70 ± 483.67<br>65.6%  | 1355.54 ± 1304.86<br>96.1%  | 7:02 ± 3:07    |
| Southern Italy            | 47.27 ± 232.94<br>6.5%   | 1112.21 ± 1149.70*<br>89.6% | 413.64 ± 774.91<br>55.8%  | 1573.12 ± 1445.60<br>92.2%  | 7:17 ± 3:06    |
| <i>Spearman's Rho</i>     | <i>0.004</i>             | <i>0.059</i>                | <i>0.006</i>              | <i>0.056</i>                | <i>0.000</i>   |
| Number of family members  |                          |                             |                           |                             |                |
| <b>1 member</b>           | 106.61 ± 496.34<br>9.8%  | 742.50 ± 827.53<br>91.1%    | 1067.92 ± 867.98<br>66.1% | 2363.72 ± 1811.20<br>95.1%  | 7:18 ± 3:09    |
| 2 members                 | 132.42 ± 517.04<br>12.1% | 929.11 ± 976.50<br>87.9%    | 918.29 ± 860.74<br>54.4%  | 2196.68 ± 1683.66<br>92.7%  | 7:11 ± 3:12    |
| 3 or more members         | 113.92 ± 404.33<br>12.0% | 961.81 ± 979.36*<br>89.6%   | 867.77 ± 798.40<br>61.5%  | 2116.50 ± 1615.83<br>93.5%  | 7:01 ± 3:05    |
| <i>Spearman's Rho</i>     | <i>0.025</i>             | <i>0.090*</i>               | <i>-0.013</i>             | <i>0.054</i>                | <i>-0.036</i>  |
| Dwelling floor space      |                          |                             |                           |                             |                |
| <b>≤ 50 m<sup>2</sup></b> | 180.44 ± 898.43<br>8.9%  | 529.33 ± 511.28<br>91.1%    | 1157.64 ± 947.99<br>62.2% | 2521.64 ± 2151.55<br>93.3%  | 8:00 ± 3:24    |
| 50 ≤ 90 m <sup>2</sup>    | 109.28 ± 434.16<br>10.5% | 813.14 ± 859.79<br>88.9%    | 952.44 ± 842.22<br>61.4%  | 2235.77 ± 1724.21<br>92.5%  | 7:21 ± 3:06    |
| > 90 m <sup>2</sup>       | 117.12 ± 426.95<br>12.3% | 979.77 ± 1015.50*<br>89.8%  | 910.58 ± 828.24<br>59.8%  | 2164.25 ± 1621.54<br>94.7%  | 6:56 ± 3:07*   |
| <i>Spearman's Rho</i>     | <i>0.033</i>             | <i>0.113*</i>               | <i>0.003</i>              | <i>0.096*</i>               | <i>-0.087*</i> |
| Private outdoor spaces    |                          |                             |                           |                             |                |
| <b>None</b>               | 174.17 ± 590.22<br>12.5% | 647.92 ± 861.53<br>89.6%    | 772.13 ± 783.31<br>64.6%  | 1706.71 ± 1315.88<br>93.8%  | 7:55 ± 3:29    |
| Balcony                   | 109.36 ± 467.57<br>10.6% | 828.78 ± 872.33<br>88.7%    | 1006.13 ± 887.24<br>59.2% | 2236.60 ± 1774.89<br>93.1%  | 7:20 ± 3:04    |
| Garden                    | 121.42 ± 448.27<br>12.4% | 1025.04 ± 1039.33*<br>90.8% | 866.17 ± 765.79<br>62.1%  | 2261.07 ± 1613.65<br>94.7%  | 6:44 ± 3:10*   |
| <i>Spearman's Rho</i>     | <i>0.018</i>             | <i>0.127*</i>               | <i>0.064</i>              | <i>0.132*</i>               | <i>-0.117*</i> |
| Residential density       |                          |                             |                           |                             |                |
| <b>Cities</b>             | 103.91 ± 413.67<br>9.7%  | 811.47 ± 914.83<br>90.1%    | 907.52 ± 794.06<br>60.9%  | 2083.23 ± 1616.63<br>94.1%  | 7:23 ± 3:13    |
| Suburbs                   | 124.60 ± 456.08<br>12.3% | 931.49 ± 921.69<br>91.1%    | 1047.10 ± 916.37<br>58.7% | 2429.91 ± 1821.68<br>95.3%  | 7:05 ± 2:57    |
| Countryside               | 138.03 ± 585.28<br>13.9% | 996.30 ± 1010.78<br>86.1%   | 870.03 ± 827.34*<br>62.4% | 2197.54 ± 1666.64*<br>90.8% | 6:44 ± 3:12*   |
| <i>Spearman's Rho</i>     | <i>0.052</i>             | <i>0.103*</i>               | <i>0.044</i>              | <i>0.107*</i>               | <i>-0.080*</i> |
| PA strategies             |                          |                             |                           |                             |                |
| <b>None</b>               | 117.07 ± 477.43<br>12.1% | 894.38 ± 937.91<br>90.5%    | 337.87 ± 614.19<br>61.2%  | 1349.31 ± 1293.56<br>94.3%  | 7:10 ± 3:05    |
| Some                      | 118.84 ± 453.36<br>10.1% | 877.83 ± 947.91<br>87.7%    | 319.68 ± 544.86<br>59.4%  | 1316.35 ± 1329.19<br>92.8%  | 7:07 ± 3:14    |

|                               |                          |                           |                           |                            |               |
|-------------------------------|--------------------------|---------------------------|---------------------------|----------------------------|---------------|
| Waist circumference           |                          |                           |                           |                            |               |
| Normal                        | 156.70 ± 527.23<br>14.8% | 837.95 ± 893.14<br>90.6%  | 369.84 ± 632.04<br>62.6%  | 1364.50 ± 1323.23<br>95.1% | 7:05 ± 3:07   |
| Abdominal obesity             | 64.94 ± 369.81<br>6.9%   | 956.93 ± 999.14*<br>88.1% | 279.50 ± 525.19<br>57.9%  | 1301.37 ± 1282.24<br>91.9% | 7:14 ± 3:11   |
| <i>Pearson's corr. coeff.</i> | -0.001                   | -0.066                    | 0.380                     | -0.045                     | 0.004         |
| BMI                           |                          |                           |                           |                            |               |
| Underweight                   | 65.66 ± 219.24<br>11.3%  | 878.11 ± 816.27<br>94.3%  | 409.14 ± 718.55<br>58.5%  | 1352.92 ± 1234.69<br>96.2% | 6:41 ± 3:13   |
| <b>Normal weight</b>          | 149.02 ± 534.56<br>13.6% | 854.89 ± 920.43<br>90.3%  | 354.61 ± 600.44<br>64.0%  | 1358.51 ± 1334.14<br>94.5% | 7:09 ± 3:09   |
| Overweight and obese          | 48.80 ± 289.73*<br>5.5%  | 980.10 ± 1020.15<br>86.0% | 249.69 ± 516.25<br>52.0%  | 1278.59 ± 1250.44<br>91.0% | 7:18 ± 3:05   |
| <i>Pearson's corr. coeff.</i> | -0.068                   | 0.045                     | -0.092*                   | -0.033                     | 0.028         |
| Lymphedema                    |                          |                           |                           |                            |               |
| <b>No</b>                     | 116.26 ± 462.23<br>11.7% | 894.01 ± 947.50<br>89.8%  | 338.00 ± 599.08<br>61.2%  | 1348.28 ± 1299.62<br>93.8% | 7:11 ± 3:11   |
| Yes                           | 129.30 ± 521.49<br>9.3%  | 844.19 ± 889.60<br>87.2%  | 278.40 ± 514.21<br>55.8%  | 1251.88 ± 1356.91<br>93.0% | 6:50 ± 2:47   |
| Quality of life               |                          |                           |                           |                            |               |
| Very poor                     | 0.00 ± 0.00<br>7.4%      | 402.00 ± 496.52<br>74.1%  | 153.45 ± 328.06*<br>51.9% | 555.45 ± 524.09<br>77.8%   | 9:32 ± 3:15*  |
| Poor                          | 116.36 ± 505.44<br>7.5%  | 796.82 ± 1018.25<br>86.3% | 217.18 ± 367.87*<br>50.7% | 1130.36 ± 1184.55<br>91.1% | 7:21 ± 3:08*  |
| Neither poor nor good         | 71.60 ± 343.87<br>9.5%   | 935.29 ± 925.60<br>89.9%  | 335.19 ± 632.01*<br>58.5% | 1342.08 ± 1252.79<br>94.4% | 6:54 ± 3:04   |
| Good                          | 134.25 ± 521.40<br>14.9% | 870.97 ± 935.63<br>92.4%  | 341.13 ± 584.81<br>66.5%  | 1346.36 ± 1352.76<br>95.6% | 7:10 ± 3:06   |
| <b>Very good</b>              | 194.71 ± 504.49<br>22.2% | 964.41 ± 1016.31<br>88.9% | 358.43 ± 619.90<br>85.2%  | 1517.55 ± 1314.58<br>96.3% | 7:30 ± 3:29   |
| <i>Spearman's Rho</i>         | 0.111*                   | 0.067                     | 0.191*                    | 0.146*                     | -0.093*       |
| Health perception             |                          |                           |                           |                            |               |
| Very poor                     | 0.00 ± 0.00*<br>0.00%    | 332.50 ± 414.72<br>50.0%  | 173.88 ± 307.02<br>50.0%  | 506.38 ± 702.54<br>50.0%   | 10:45 ± 2:36* |
| Poor                          | 120.00 ± 692.59<br>6.2%  | 842.65 ± 1033.74<br>81.4% | 246.49 ± 511.67<br>46.9%  | 1209.14 ± 1461.38<br>88.5% | 7:19 ± 2:59   |
| Neither poor nor good         | 66.67 ± 285.89<br>7.7%   | 928.13 ± 976.38<br>88.6%  | 311.41 ± 587.97<br>60.8%  | 1306.21 ± 1247.26<br>93.4% | 7:04 ± 3:08   |
| Good                          | 148.97 ± 494.59<br>14.7% | 898.01 ± 917.71<br>93.5%  | 361.81 ± 615.41<br>63.0%  | 1408.79 ± 1324.87<br>96.2% | 7:07 ± 3:09   |
| <b>Very good</b>              | 203.48 ± 489.52<br>23.9% | 792.61 ± 672.79<br>91.3%  | 461.30 ± 611.49<br>76.1%  | 1457.39 ± 1123.08<br>97.8% | 6:47 ± 3:16   |
| <i>Spearman's Rho</i>         | 0.146*                   | 0.068                     | 0.130*                    | 0.121*                     | -0.044        |
| Psychotropic drugs            |                          |                           |                           |                            |               |
| <b>No</b>                     | 127.35 ± 488.96          | 876.48 ± 916.74           | 335.90 ± 600.02           | 1339.73 ± 1289.99          | 7:09 ± 3:08   |

|     |                        |                           |                          |                            |             |
|-----|------------------------|---------------------------|--------------------------|----------------------------|-------------|
|     | 12.1%                  | 89.9%                     | 60.2%                    | 93.9%                      |             |
| Yes | 68.44 ± 345.45<br>7.8% | 950.00 ± 1057.29<br>87.5% | 308.70 ± 539.80<br>62.5% | 1327.14 ± 1387.23<br>93.0% | 7:11 ± 3:11 |

\* Student *t*-test or ANOVA (Dunnet *post-hoc*); *p* <0.05. Control groups are in bold.

Notes: PA = Physical Activity.
